# Supplementary material for: Land transformation driven by wind and solar development in Brazilian municipalities
Source: Research Square preprint supplement (doi:10.21203/rs.3.rs-8525374/v1), 2026-01-23
Supplement: Supplementary file 1 [file 19d8c8ded148d6bf6ad874b4.docx]

**Land transformation driven by wind and solar development in Brazilian municipalities**

Felipe Husadel Poyer1*; Polyanna da Conceição Bispo2; Paula Conde Santos Borba1,3; Meiriele Alvarenga Cumplido1; [Argemiro Teixeira Leite-Filho](https://rmets.onlinelibrary.wiley.com/authored-by/Leite%E2%80%90Filho/Argemiro+Teixeira)1; Murilo da Costa Ruv Lemes1; Christhian Santana Cunha4; André F. P. Lucena5; Enio Bueno Pereira1

1 *Division of Impacts, Adaptation and Vulnerabilities (DIIAV), National Institute for Space Research (INPE): Avenida dos Astronautas, 1758, CEP: 12227-010, São José dos Campos, São Paulo, Brasil*

2 *University of* *Manchester, Department of Geography, School of Environment, Education and Development: Oxford Road, M13 9PL, Manchester, United Kingdom.*

*3 Institute of Marine Science (IMar), Federal University of São Paulo (UNIFESP): Rua Carvalho de Mendonça, 144, CEP: 11030-100, Santos, São Paulo, Brasil.*

*4 Federal University of Rio Grande do Sul (UFRGS): Avenida Paulo Gama, 110, CEP: 9004-060, Porto Alegre, Rio Grande do Sul, Brasil*

*5 Center for Energy and Environmental Economics (CENERGIA), Energy Planning Program (PPE), COPPE, Federal University of Rio de Janeiro (UFRJ): Cidade Universitária, Centro de Tecnologia, Ilha do Fundão, CEP: 21941-972, Rio de Janeiro, Brasil*

** Corresponding author:* [*felipe.poyer@inpe.br*](mailto:felipe.poyer@inpe.br)

# Supplementary Material

*1 – Statistical Analyses*

As explained in Sections 2.4 of the main article, to assess the relationship between Land Use and Cover Change (LUCC) and energy infrastructure development, the time series for each land use and land cover category in every municipality was statistically evaluated by different methodologies.

Spearman Correlation Coefficient (SCC) is a statistical test used to quantify the degree correlation between two datasets, it can assess either linear or non-linear correlations. Its yields values ranging from −1 to 1, where -1 indicates a perfect negative correlation and +1 indicates a perfect positive correlation. A value of between -0.7 and +0.7 is generally considered too weak to be a significant result. Positive coefficients indicate a direct relationship between the two-time series, whereby increases in one variable correspond to increases in the other. Conversely, negative coefficients reflect an inverse relationship (Spearman 1904).

T-Student test was used to assess whether the difference between the response of the two groups was [statistically significant](https://en.wikipedia.org/wiki/Statistical_significance) or not. The test is the ratio between the difference of the mean value of the two time-series and its standard deviation. After applying the T-test it was possible to identify the respective probability value (p-value), which is a key output of the test. It represents the probability of observing the data if the null hypothesis is true (Altman and Krzywinsky 2017, Student 1908).

The Mann-Kendal test is a non-parametric statistical method used to identify monotonic trends (either increasing or decreasing) in time series data. It works by comparing each data point with all subsequent observations and counting the number of times a later value is greater or less than an earlier one. This cumulative comparison provides the basis for determining whether the observed trend is statistically significant without making assumptions about the distribution of the data (Mann 1945, Kendall 1975).

The Granger causality test is a statistical hypothesis test used to assess whether one-time series can be used to predict another. Specifically, it evaluates whether past values of time series X provide statistically significant information that improves the prediction of time series Y beyond that achievable using only the past values of Y; if so, X is said to 'Granger-cause' Y (Granger 1969).

In the Granger causality approach, a 'lag' refers to the number of previous time steps of a variable that are included as explanatory terms in a predictive model. The test assesses whether incorporating the lagged values of one-time series (e.g. X) into a model that relies solely on the lagged values of another time series (e.g. Y) significantly improves the forecast accuracy of the latter. The choice of lag length is critical, as it affects the sensitivity of the test and the validity of its conclusions regarding temporal precedence and predictive influence. Considering that in average a large-scale centralized wind or a solar PV power plant construction takes about 3 to 4 years long. In this study the Granger test was calculated with lag=3 and lag=4, which means that the causality between LULC transformation and renewable power plants implementation will be tested for a 3 or 4 years’ delay. The Granger test for each lag is independent, and the causality can be confirmed individually for any of the lags.

*2- Results*

As explained in Sections 3.4 of the main article, Table 1 present the results for the statistical tests between municipal LUCC and the implementation of renewable energy power plants considering the municipal economic status measured by the gross domestic product per capita (GDP/capita).

Table 1 – Statistical analysis between LUCC time-series and the renewable power plants implementation timeline considering municipalities income.

As explained in Sections 3.5 of the main article, Table 2 present the results for the statistical tests between municipal LUCC and the implementation of renewable energy power plants considering the renewable energy source (wind vs. solar).

Table 2 - Statistical analysis between LUCC time-series and the renewable power plants implementation timeline by energy source.

As explained in Sections 3.6 of the main article, Table 3 present the results for the statistical tests between municipal LUCC and the implementation of renewable energy power plants considering Brazil´s federative states.

Table 3 – Statistical analysis between LUCC time-series and the renewable power plants implementation timeline by state.
